# Supplementary material
Source: publisher site journal article supplement (https://www.dovepress.com/article/280478)
Supplement: Supplementary file 1 [file get_supplementary_file.php]

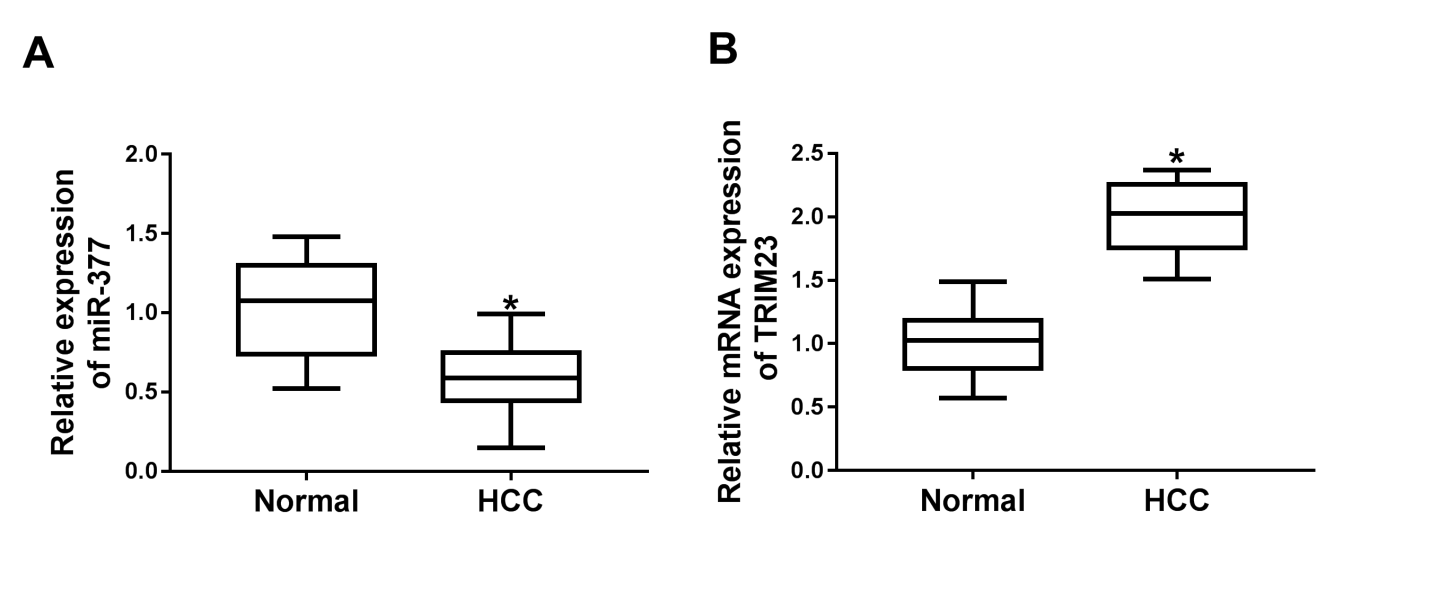


**Supplement Figure 1. MiR-377 was downregulated, while TRIM23 was upregulated in HCC tissues.** (A-B) The expression of miR-377 and TRIM23 in HCC tissues and normal tissues was detected by qRT-PCR. **P*<0.05.
